# Supplementary material for: Effect of Harvest Time on the Seed Yield and Quality of Kengyilia melanthera
Source: MDPI journal article supplement (doi:10.3390/agronomy13010055), 2022-12-23
Supplement: s1 [file s1]

Table S1 Basic nutrient of experimental soil

| Soil depth<br>/cm | pH   | Organic matte<br>/g·kg <sup>-1</sup> | Total nitrogen<br>/g·kg <sup>-1</sup> | Total phosphorus<br>/g·kg <sup>-1</sup> | Total potassium<br>/g·kg <sup>-1</sup> | Available nitrogen<br>/mg·kg <sup>-1</sup> | Available phosphorus<br>/mg·kg <sup>-1</sup> | Available potassium<br>/mg·kg <sup>-1</sup> |
|-------------------|------|--------------------------------------|---------------------------------------|-----------------------------------------|----------------------------------------|--------------------------------------------|----------------------------------------------|---------------------------------------------|
| 0~30              | 6.02 | 13.8                                 | 1.32                                  | 0.86                                    | 0.68                                   | 87.47                                      | 62.55                                        | 227.46                                      |
| 30~60             | 6.14 | 14.7                                 | 0.81                                  | 0.74                                    | 0.72                                   | 74.38                                      | 51.37                                        | 207.56                                      |
