# Supplementary material for: Effect of Harvest Time on the Seed Yield and Quality of Kengyilia melanthera
Source: MDPI journal article supplement (doi:10.3390/agronomy13010055), 2022-12-23
Supplement: s1 [file s1]

**Table S2** The influences of multi-indicator analysis of membership functions on *K. melanthera* on different days after peak anthesis during the 2017 trial year.

| Parameter                               | Days after peak anthesis |                |                |                |                |                |                |                |
|-----------------------------------------|--------------------------|----------------|----------------|----------------|----------------|----------------|----------------|----------------|
|                                         | D <sub>1</sub>           | D <sub>2</sub> | D <sub>3</sub> | D <sub>4</sub> | D <sub>5</sub> | D <sub>6</sub> | D <sub>7</sub> | D <sub>8</sub> |
| WC (%)                                  | 0.00                     | 0.15           | 0.34           | 0.79           | 0.96           | 1.00           | 0.99           | 0.97           |
| FW (g)                                  | 0.00                     | 0.22           | 0.79           | 0.94           | 0.95           | 1.00           | 0.96           | 0.94           |
| DW (g)                                  | 0.00                     | 0.15           | 0.45           | 0.82           | 0.95           | 1.00           | 0.97           | 0.95           |
| SY (kg·hm <sup>-2</sup> )               | 0.00                     | 0.18           | 0.46           | 0.75           | 0.92           | 1.00           | 0.98           | 0.94           |
| TGW (g)                                 | 0.00                     | 0.24           | 0.58           | 0.82           | 0.94           | 1.00           | 0.98           | 0.95           |
| GEP (%)                                 | 0.00                     | 0.09           | 0.45           | 0.61           | 0.82           | 1.00           | 0.91           | 0.73           |
| GP (%)                                  | 0.00                     | 0.11           | 0.47           | 0.67           | 0.83           | 1.00           | 0.97           | 0.81           |
| AAGP (%)                                | 0.00                     | 0.24           | 0.55           | 0.78           | 0.93           | 0.99           | 0.97           | 1.00           |
| DA (μg·mL <sup>-1</sup> )               | 0.00                     | 0.04           | 0.29           | 0.43           | 0.64           | 1.00           | 0.95           | 0.87           |
| APA (nmol·min <sup>-1</sup> . 50 seeds) | 0.00                     | 0.13           | 0.22           | 0.39           | 0.69           | 1.00           | 0.92           | 0.76           |
| Rank                                    | 8                        | 7              | 6              | 5              | 4              | 1              | 2              | 3              |

WC, water content; FW, fresh weight; DW, dry weight; SY, seed yield; TGW, thousand-grain weight; GEP, germination percentage; GP, germination potential; AAGP, accelerated aging germination percentage; DA, dehydrogenase activity; APA, acid phosphoesterase activity; D<sub>1</sub>—15th day after peak anthesis (control), D<sub>2</sub>—18th day after peak anthesis, D<sub>3</sub>—21st day after peak anthesis, D<sub>4</sub>—24th day after peak anthesis, D<sub>5</sub>—27th day after peak anthesis, D<sub>6</sub>—30th day after peak anthesis, D<sub>7</sub>—33rd day after peak anthesis, D<sub>8</sub>—36th day after peak anthesis.
