# Supplementary figures and images for: Effect of Harvest Time on the Seed Yield and Quality of Kengyilia melanthera
Source: MDPI journal article supplement (doi:10.3390/agronomy13010055), 2022-12-23

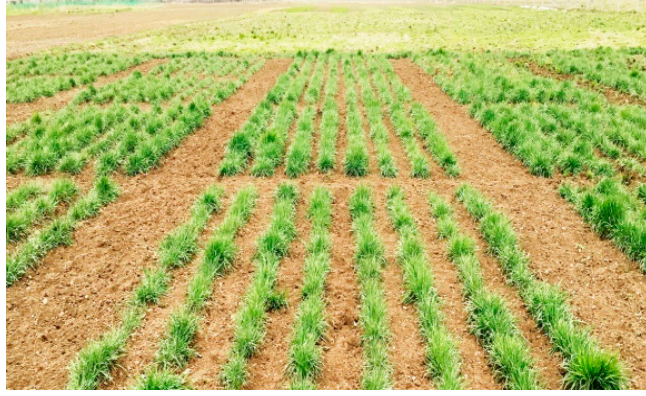

(a)

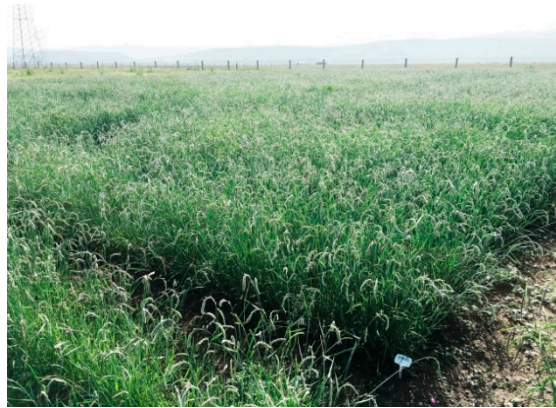

(b)

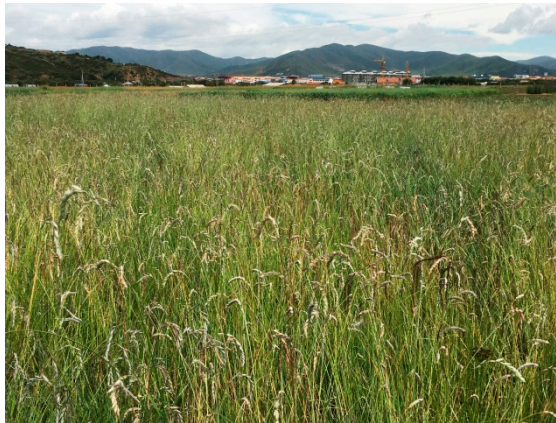

(c)

Figure S1. Tillering stage (a), peak anthesis stage (b), maturity stage (c) of *K. melanthera*.

Supplement: s1 [file s1]
